# **Genome-Wide Identification, Characterization and Expression Analysis of Non-Arginine Aspartate Receptor like kinase gene family under *Colletotrichum truncatum* stress conditions in Hot pepper**

R Srideepthi<sup>1</sup>, MSR Krishna<sup>1\*</sup>, Suneetha P<sup>2</sup>, R Sai Krishna<sup>3</sup>, Karthikeyan S<sup>1</sup>,

1: Department of Biotechnology, Koneru Lakshmaiah Education Foundation, Guntur, Andhra Pradesh, India

2: Institute of biotechnology, Professor Jaya Shankar Telangana State Agricultural University, Hyderabad, India

3: Crop production, ICAR-National Rice Research Institute, Cuttack, Odisha, India

1 \*Corresponding author: [msrkrishna81@gmail.com](mailto:msrkrishna81@gmail.com)

## 2 Abstract

3 Receptor Like kinases (RLKs) are conserved upstream signaling molecules that regulate several  
4 biological processes, including plant development and stress adaptation. Non arginine aspartate  
5 (non-RD) an important class of RLKs plays a vital role in disease resistance and apoptosis in  
6 plants. In present investigation, a comprehensive Insilco analysis for non-RD Kinase gene family  
7 including identification, sequence similarity, phylogeny, chromosomal localization, gene  
8 structures, gene duplication analysis, promoter analysis and transcript expression profiles were  
9 elucidated. In this study twenty six genes were observed on nine out of twelve chromosomes. All  
10 these genes were clustered into seven subfamilies under large monophyletic group termed as  
11 Interleukin-1 Receptor-Associated Kinase (IRAK) family. Structural diversity in genomic  
12 structure among non-RD kinase gene family were identified and presence of pathogen induced  
13 *cis* regulatory elements like STRE, MYC, MYB, W box were found. Expression profiles of genes  
14 involved in providing resistance to anthracnose pathogen *Colletotrichum truncatum* in hot  
15 pepper were analyzed at different infective stages in both resistant and susceptible genotypes.  
16 Among twenty six genes, *CaRLK1* gene belonging to LRRXII subfamily was up regulated under  
17 severe stress after infection in resistant genotype PBC-80. This integrative approach has helped  
18 us to identify candidate genes involved in disease resistance which would be helpful in future  
19 crop improvement programs.

20 **Keywords:** Pattern Recognition Receptors (PRRs), Autophosphorylation, Downstream  
21 Signaling, *Colletotrichum truncatum*, defense responses.

22

23

24

25

26

## 27 **Introduction**

28 One of the major challenges in the 21<sup>st</sup> century, to global food security and agricultural  
29 sustainability is to develop economically important high yielding varieties which are stable  
30 with broad-spectrum of resistance. Hot pepper is a commercially important vegetable crop  
31 grown worldwide for its indispensable nutritional and therapeutic values, but year by year its  
32 production has been reduced due to several biotic stresses [1]. Reason might be due to existence  
33 of limited resistant cultivars, existence of variability within the *Colletotrichum truncatum* species  
34 with erratic pathogenic ability with respect to different hosts, climatic conditions and commercial  
35 pesticides used remained as an unsatisfactory measures for its effective control [2]. As a part of  
36 its development of anthracnose resistant hot pepper remained as one of the major tasks to be  
37 resolved by modern agriculture practices prevailing worldwide. Congruently knowledge of  
38 understanding the defensive signaling mechanisms employed by resistant plants while  
39 encountering the attacking pathogen by advanced molecular and computational techniques paved  
40 a ray of hope to address these challenges [3].

41 RLKs are surface localized receptor-like protein kinases employed by Pattern recognition  
42 receptor (PRRs) proteins of plants innate immune system as a primary defensive response [4].  
43 These are involved in signal perception from pathogen by ectodomain, then transduction of  
44 signal by transmembrane region and then activation / deactivation of signaling cascade by kinase  
45 domain. Classification of ecto-domain was done based on the type of ligand binding specificities  
46 [5] and endo domain based on presence or absence of conserved arginine residues present  
47 immediately preceding to aspartate in catalytic domain VI of kinase domain [6]. Among various  
48 types of RLKs, predominantly non-RD RLKs were allied with innate immune receptors that  
49 recognize conserved microbial signatures and activate pattern triggered immunity (PTI) involved

50 in disease resistance [7]. Till now 35 genes in Arabidopsis and 328 genes in Rice were identified  
51 to possess non-RD class of kinase receptor proteins. Functionally characterized non-RD kinases  
52 like, XA21 BSR1 and XA26 from Rice and FLS2, EFR from Arabidopsis thaliana were known  
53 to be effective against bacteria [8] while Pi-D2 gene of lectin (non-RD) kinase was found to  
54 express broad-spectrum resistance against *Magnaporthe grisea* [9]. *LecRK-VI.2* from  
55 *Arabidopsis thaliana* [10] and WRKY from tomato [11] serve as a potential link in providing  
56 resistance against bacterial and fungal pathogens. Hence due to limited availability of literature  
57 on non-RD kinases in hot pepper and available free online software motivated us to identify the  
58 presence of candidate non-RD genes associated with disease resistance through comparative  
59 genomics.

## 60 **Materials and methods**

### 61 **Identification of transmembrane receptor kinases in hot pepper**

62 Identified and known RLKs from sequenced plant genomes like Arabidopsis, Rice and tomato  
63 were collected as query sequences from NCBI (<https://www.ncbi.nlm.nih.gov>). Collected query  
64 sequences were submitted to blast search against hot pepper CM-334 variety genome datasets  
65 (<http://www.solgenomics.net>) version 1.55 of *capsicum annuum*. Protein sequences sharing more  
66 than 50% homology with query were selected for further analysis. The presence of signal peptide  
67 was determined by SignalP 4.0 Server (<http://www.cbs.dtu.dk/services/SignalP/>)[12].  
68 Extracellular ligand-binding domain, transmembrane, and intracellular kinase domain were  
69 filtered by online domain search databases SMART (<http://smart.emblheidelberg.de/>) [13] and  
70 Pfam with inbuilt HMMER search platform [14]. While Conserved motifs were identified using  
71 the MEME program (<http://meme-suite.org/index.html>). This program was run with default

72 settings except to set a maximum ten in number with the three hundred widths of motifs [15].  
73 Based on the conserved motifs and phylogenetic analysis, receptors like kinases in hot pepper  
74 were bundled.

## 75 **Phylogenetic analysis of transmembrane receptor kinases**

76 All known and recognized transmembrane receptor protein kinases (RLKs) belonging to model  
77 plant species like *Solanum Lycopersicum* [16], *Arabidopsis thaliana* and *Oryza sativa* [17] were  
78 taken together for phylogenetic analysis. Identified and characterized reference proteins at least  
79 one from each family and subfamilies belonging to respective clades of three model plants along  
80 with identified putative gene CaRLK Fasta sequences were submitted to MEGA software version  
81 6.0 [18]. All sequences of CaRLK genes were submitted to multiple sequences alignment using  
82 Multiple Sequence Comparison by Log- Expectation (MUSCLE) with default values. Then  
83 phylogenetic tree was constructed using the Neighbor-joining (NJ) method with thousand  
84 numbers of bootstrap replications.

## 85 **Analysis of CaRLK Physiochemical Properties**

86 Physiochemical parameters of putative CaRLK gene including molecular weight, isoelectric  
87 point, number of amino acids, aliphatic index, and grand average of hydropathicity (GRAVY)  
88 score was determined using online ExPASy programs (<http://www.expasy.org/>). Subcellular  
89 locations of CaRLK proteins were predicted using the online Plant-PLoc tool  
90 (<http://www.csbio.sjtu.edu.cn/bioinf/plant-multi/>) program.

## 91 **Chromosomal Distribution and Duplication of CaRLK Genes**

92 Information regarding position and location of chromosomes on which CaRLK gene members  
93 were present was derived from hot Pepper Genome Platform (PGP) (<http://Hot>  
94 [peppergenome.snu.ac.kr/](http://peppergenome.snu.ac.kr/)). Genes were mapped onto chromosome at their genomic position and  
95 drawn manually. Duplicated genes were identified by Blast P search against each other when  
96 both their identity and query coverage was >80% of their partner sequence [19]. Tandem  
97 duplication in genes was identified by occurrence of homologous genes located in single  
98 region(<100kb) within a chromosome, while segmental duplication occurs among homologous  
99 or non-homologous genes with > 1kb in length and more than 90% sequence similarity dispersed  
100 but present on same or different chromosomes from the same clade as described by Feng et al.  
101 (2017) [20]. Consequently, non-synonymous (Ka) and synonymous substitution (Ks) among  
102 duplicated CaRLK gene pairs were calculated using PAL2NAL  
103 (<http://www.bork.embl.de/pal2nal/>). The divergence time of the duplicated gene pairs was  
104 calculated as described by Koch et al. (2000) [21].

## 105 **Gene structure and Cis-regulatory element analysis**

106 Gene structure was elucidated based on the relationship of the coding sequence and its  
107 corresponding genomic DNA sequence by GSDS 2.0 (<http://gsds.cbi.pku.edu.cn/>). *Cis*-acting  
108 regulatory elements of genomic DNA sequences of 3000 bp 5' upstream region was mined from  
109 the Sol Genomics Network database. Promoter sequences obtained were submitted in Plant Care  
110 Database (<http://bioinformatics.psb.ugent.be/webtools/plantcare/html/>) individually. Conserved  
111 biotic-stress responsive elements in hot pepper were predicted, as described by Diao et al. (2018)  
112 [22].

## 113 **Primer Design**

114 Genomic and its Coding sequences (CDS) of deduced RLK hot pepper proteins were retrieved  
115 from Sol Genomics Network (<https://solgenomics.net/>). Primer sets for RT-qPCR were designed  
116 in 3 and 5 untranslated regions of individual genes to avoid non-specific amplification using  
117 Prime Quest Tool (<http://eu.idtdna.com/PrimerQuest/Home/Index>) [23]. For all primers  
118 Ubiquitin 3 was used as reference gene. Genes with accession numbers and code assigned in the  
119 study (S1-Table).

## 120 **Plant Material, Fungal Strains and Stress Treatments**

121 Seeds of two hot pepper genotypes pbc-80 (anthracnose resistant) from National Bureau of Plant  
122 and Genetic Resources (NBPGR), Hyderabad and Pusa Jwala (anthracnose susceptible) from  
123 Horticulture Research Station, Lam Farm, Guntur, Andhra Pradesh were collected for the study.  
124 Seeds were scattered in black trays containing autoclaved blend of peat and vermiculite (2:1 v/v)  
125 along with micronutrients mixture. Seedlings were raised and watered regularly in a greenhouse  
126 under controlled conditions i.e., 16 h light/8 h dark photoperiod at 27 °C throughout the day and  
127 21°C during the night. Fungi were isolated from fruit rot infected hot pepper samples by single  
128 spore isolation technique. Isolate *Colletotrichum truncatum* was cultured on Oatmeal agar  
129 medium with pH 7.0 at 25±2°C. Spore suspension was prepared from seven days old culture and  
130 sprayed on seedlings by artificial inoculation method as described by Mishra et al (2017)  
131 [24].with 5x 10<sup>5</sup>spores/ml concentration. Three-week old hot pepper seedlings were taken for  
132 experimental studies. Genotypes PBC-80 and Pusa Jwala sprayed with conidial suspension were  
133 considered to be treated and those trays sprayed with autoclaved distilled water as control. Each  
134 treatment was maintained with three replications.

## 135 **RNA Extraction**

136 RNA was extracted from leaf tissue of stressed and control genotypes according to acid  
137 guanidinium thiocyanate-phenol-chloroform extraction method [25]. Leaf tissue (100 mg) was  
138 ground into fine powder by using liquid nitrogen in mortar and pestle. Fine powder was  
139 transferred carefully into 2 ml eppendorf tubes with extraction buffer and centrifuged at 12,000  
140 rpm at 4° C for 10 minutes. Supernatant was collected and equal aliquots of chloroform was  
141 added to it and centrifuged for 10 minutes at 12,000 rpm. To upper aqueous layer ice cold  
142 propanol and 1.5 M NaCl was added and incubated at 4 ° C for 5 min. Then tubes with solution  
143 was centrifuged for 10 minutes at 12,000 rpm and supernatant was discarded. The resultant pellet  
144 was subjected to ethanol wash and allowed for air drying. Pellet was dissolved in DEPC water.  
145 RNA samples were treated with DNase I (RNase-free) (Takara- cat # 2270B) to remove residual  
146 genomic DNA. The purity and integrity of RNA were determined by calculating A260/A230 and  
147 A260/280 absorbance ratio. RNA was visualized in 1.5 percent agarose gel after electrophoresis.

## 148 **Quantitative Real-Time PCR**

149 cDNA was produced in triplicates from three µg of RNA by prime script 1st strand cDNA  
150 synthesis kit (Takara-cat # 6110A). Gene expression was scrutinized in reverse transcription-  
151 quantitative polymerase chain reaction (RT-qPCR) (QuantStudio3-Applied Biosystems). Twelve  
152 µl reaction mixture (Sybr Green—6 µl, cDNA—2 µl, Forward Primer—1 µl, Reverse Primer—1  
153 µl, DEPC water—2 µl) was loaded in 96-Well Reaction Plates enclosed with microamp Optical  
154 Adhesive Film (Applied Biosystems). Standard cycling parameters and baseline thresholds were  
155 set manually along with UBI-3 as a reference gene. CT values were calculated by using  
156 software. Proficiency of RT-qPCR reaction for every single RLK gene was deliberated from  
157 standard curve gained by serial dilutions of pooled cDNA. Relative gene expression among the  
158 samples was calculated using the 2-DDCT method [26]. In this method, an estimated level of



159 gene expression was purely based on a hypothesis of 100% PCR efficiency of reference and  
160 target genes. RT-qPCR products were visualized on 2% agarose gel. The presence of distinct  
161 single band with expected amplicon size was considered as specific amplification [27].

162

## 163 **Statistical Analysis**

164 Expression studies for all the four samples (pbc-80 control, pbc-80 stressed, pusa jwala control  
165 and pusa jwala stressed) were carried out at three biological replicates, two technical replicates  
166 and were retained at each point of time intervals. Data were represented as mean  $\pm$  standard  
167 deviation. All the data were tested for significance between resistant and susceptible genotypes  
168 using analysis of variance (ANOVA) at 5% probability. Relative gene expression was generated  
169 using heat mapper (<http://heatmapper.ca/>).

## 170 **Results**

### 171 **Identification and annotation of transmembrane receptor kinases**

172 Blast P homology searches revealed 3,150 hits with pepper genome database. Among them 1,208  
173 hot pepper sequences were found to share more than 50 percent homology with a sequence  
174 length ranging from 100-2000 amino acid [28]. From PDB database optimized length of known  
175 receptor like kinase sequences ranged from 100-1000 amino acids [S10]. Hence non redundant  
176 sequences within the optimized range were considered for further study while remaining  
177 redundant sequences were removed manually. A Total of 164 Sequences with typical domain  
178 organization viz., presence of signal peptide, varying extracellular domains, a transmembrane  
179 region and an intracellular kinase domain were retrieved from respective databases. Based on  
180 Conserved motifs type of ectodomain was distinguished and details were illustrated in (S6 Fig).

181 Naming to each gene was specified with the first two letters indicating *Capsicum annuum* (Ca)  
182 third letter representing the non-RD class of transmembrane receptor-like kinase (RLK) family  
183 followed by serial numbers [29].

184

## 185 **Phylogeny Analysis**

186 Phylogenetic analysis revealed the existence of seven gene families under respective clades in which each  
187 clade contains one gene from tomato, and Arabidopsis (Fig 1). Phylogeny grouping revealed the  
188 evolutionary relationship of each gene family and their respective subfamilies under respective clades.  
189 Pictorial illustration revealed the occurrence of 1. Cysteine-rich receptor-like kinases (Stress antifung)  
190 represented in pale green color. 2. Wall Associated Kinases (LRK10L2, LRK10L1) in red color. 3. L-  
191 type Lectin receptor like kinases (lectin Leg B) in violet color. 4. G-type lectin receptor like kinases  
192 (SD1a, SD2b, SD3) in green 5. Lys M receptor like kinases in pink color. 6. Malectin receptor like  
193 kinases in chocolate brown color. 7. Leucine-rich repeat (LRR) receptor like kinases – LRR Ia, LRR- II,  
194 LRR- III, LRR- IV, LRR-V, LRR VIII, LRR IX, LRRXI, LRRXII in dark green color were found. In hot  
195 pepper extracellular domains containing RLKs similar to C-type lectin (sky blue), URK1, PERK,  
196 extensin (yellow) receptor like kinases were not observed in our analysis.

197 **Fig. 1.** Phylogenetic analysis of Receptor like kinase gene family from hot pepper. The  
198 phylogenetic tree was constructed using neighbor-joining (NJ) method by MEGA6.0. Subfamilies  
199 was specified in different colors

## 200 **Classification of Kinase Domains**

201 Based on kinase domain organization CaRLKs were classified into three types. Based on the  
202 presence or absence of the conserved residue Arginine (R) present adjacent to Aspartic acid (D)

203 in subdomain VI, conserved lysine (K) residue and Aspartic acid (D) in subdomain II and VII  
204 kinase regions. Presence of Arginine (R) adjacent to aspartic acid as RD Kinases those lacking R  
205 as Non-RD Kinases and lack of any one or more of the K/D/D residues were classified as RD  
206 minus. Finally, 26 protein sequences were found to possess Leucine, cysteine, phenylalanine,  
207 Glycine, and Serine residues substituted in place of arginine. In Supplementary Table (S2)  
208 distribution of conserved residues in II, VI and VII domains of 26 genes with respect to their  
209 corresponding ectodomain and respective clades fitting to them were given in detail. Multiple  
210 sequence alignment of twenty-six genes (S5 Fig) were predicted to share a common linkage as  
211 they are descended from a common ancestor. However all 26 CaRLK genes were predominantly  
212 grouped under respective LRRXII, LRRXI, SD1a, SD2b, SD3, LRK10L2 and WAK/LRK10L1  
213 clades in their phylogenetic relationship.

## 214 **Physiochemical Properties**

215 Non-RD receptor-like protein kinases vary significantly with respect to their structural and  
216 physical properties. Genes CaRLK6 with the highest number (1789) of amino acids and  
217 CaRLK23 with the lowest number of amino acids (620) was observed while CaRLK17 with high  
218 molecular weight (954.89) and CaRLK 23 with low molecular weight (70.11) respectively.  
219 Consequently, a wide variation was observed in their isoelectric point (PI) ranging from 5.69  
220 (CaRLK14) to 8.63 (CaRLK10). Instability index ranged from 28.84 - 46.15 where 19 genes  
221 were considered to be stable as they exhibit instability index value less than 40, whereas the rest  
222 7 among 26 non-RD RLKs were considered as unstable. Grand average hydropathicity (Gravy)  
223 values ranged from -0.345 (CaRLK19) to +0.12 (CaRLK10) inferring the presence of both  
224 hydrophilic and hydrophobic amino acids. Aliphatic index determines the thermal stability of a  
225 protein. Among 26 proteins high aliphatic index was observed (CaRLK 19- 79.07 to CaRLK 7-

226 111.49) indicating that all are thermally stable with more number of hydrophobic amino acids in  
227 their structure. Most of them were found to be localized in extracellular spaces of cell membrane  
228 followed by chloroplast, nucleus, and mitochondria. Physiochemical Characteristics of each  
229 protein were given (S3 Table) in detail.

## 230 **Chromosomal Localization**

231 The inherent ability of a host to defend against pathogens mostly depends on the occurrence of  
232 resistance genes and activation of their signaling mechanism present on chromosomes. A total of  
233 twenty-six putative genes belonging to non-RD class were aligned on 9 out of 12 chromosomes.  
234 Chromosomes 3, 9 and 10 were devoid of non-RD genes, while in contrast a maximum number  
235 of seven genes were observed on chromosome 2. Thirteen genes - CaRLK 9,11, 12, 13 on  
236 second, CaRLK6, 7 on fourth , CaRLK 2, 8, 10 on sixth while CaRLK3, 4, 5 on fifth and  
237 CaRLK 1 on eleventh chromosome belongs to LRRXII subfamily respectively as shown (S4).  
238 Single non-RD genes CaRLK 19, 20 and 24 were aligned separately on each of Chromosome 1,  
239 8 and 12 were clustered under SD3, SD2b, and LRK10L2 subfamilies were aligned under same  
240 clade respectively. Four genes CaRLK 15, 17, 18, and 21 from same G-type Lectin subfamily  
241 located on chromosome 7 were scattered on different clade branches as shown phylogeny figure.

## 242 **Duplication analysis of CaRLK genes in hot pepper:**

243 The evolution of gene duplication reveals results in family expansion and the occurrence of  
244 novel genes in a genome. Three pairs of genes showed tandem duplication CaRLK 27/28 and  
245 CaRLK 13/10, 14/15 while only one paralog pair CaRLK17/18 from CRLK was identified to  
246 exhibit segmental duplication (S5). All three gene pairs of tandem duplication type possessed  
247 Ka/Ks ratios less than 0.5 indicating that genes experienced purifying selection pressure. While

248 gene pair CaRLK 17&18 showed Ka/Ks ratios < 1.0 implying positive mode of selection. The  
249 divergence time of non-RD genes exposes the duplication events started from 5.86 Mya and  
250 continued up to 3.77 Mya in evolution.

## 251 **Gene structure analysis**

252 Gene length varied from 2,224 bp (CaRLK 24) to 21,556 bp (CaRLK 6). Moreover, genes with  
253 either positive or negative sense strand as a template to the coding regions are depicted in  
254 Supplementary Table (S3). Various exon-intron positions were compared to gain insight into  
255 possible mechanisms of structural diversity existing among Non-RD kinases in *Capsicum*  
256 *annuum*. In this study introns varied from 0-12 in number. CaRLK 6 gene from LRRXII family  
257 showed a maximum of 12 introns. While in contrast a total of four genes (CaRLK 17, 18, 20 and  
258 21) from G- type lectin and single gene CaRLK 13 from LRR type family were found to occur  
259 without introns in their structure. Genes from same family showed similar intron organization.  
260 Where Genes CaRLK 15, 16 from Stress-antifung subfamily showed six number of introns.  
261 While contrarily genes from LRR family possessed varied introns like ten genes (CaRLK 1, 2,  
262 3, 4, 5, 8, 9, 14 ,19 and 23) with single intron. Four Genes (CaRLK 10, 11, 22 and 24) with two  
263 introns and three genes (CaRLK 7, 25, 26) with three introns were observed in their structural  
264 organization. Moreover LRRXII clade members CaRLK23 with single intron and CaRLK 22,  
265 24 with two introns also showed varied introns organization in their structure

## 266 **Cis-regulatory element analysis**

267 *Cis*-regulatory element analysis promotes a good insight to understand the expression patterns of  
268 a gene under various stress conditions, whose validation needs to be warranted. Major pathogen-  
269 induced *cis*-regulatory elements identified in hot pepper (S7). Among twenty-six non RD genes

270 highest number of *cis*-regulatory elements (TGACG, STRE) known to be involved in defense  
271 and stress responses were found in CaRLK 3, 11 from LRR and CaRLK 16 from G-type lectin  
272 subfamily. Fungal elicitor and oxidative responsive *cis* regulatory elements viz., W-box, F-box,  
273 As1 and box4 were observed majorly in CaRLK 1, 7,8 from LRR and 22, 26 from WAK family  
274 Correspondingly elicitor responsive element G-box and Abscisic acid signifying region ABRE  
275 were observed in abundance among promoter regions of CaRLK3, 15, 17, 23 and 26 genes.  
276 Whereas Myb and Myc binding sites responsible for triggering stress-responsive metabolic  
277 pathway were found to occur predominately in CaRLK21, CaRLK 1 and 15. Moreover, only 32  
278 percent of genes showed the presence of TC-rich repeat and TCA element linked with salicylic  
279 acid and methyl jasmonic acid pathway. When compared to all genes CaRLK1 and CaRLK16  
280 from LRR family were identified to hold more number of *cis*-regulatory elements and may  
281 associate intensely with defense responsive mechanism.

## 282 **Heat Map Analysis**

283 Differential expression of three family genes at varied time interval was observed in resistant  
284 (pbc-80) and susceptible (PJ) Hot pepper genotypes (Fig 2).

285 **Fig. 2.** Differential expression analyses of CaRLK genes under biotic stress. Treatment in PBC-  
286 80 (a) and pusa jwala (b) Hot pepper seedlings. The color scale represents log<sub>2</sub> expression  
287 values.

## 288 **Expression profiles of CaRLK genes at various stress treatments**

289 At Initial stages of infection after 24 hours of inoculation, genes from LRR type (CaRLK 14, 1)  
290 G-type lectin (CaRLK15, 16 and 19) and Wall associated kinase (CaRLK 23, 24) showed  
291 significant up-regulation in Pbc-80 when compared to that of Pusa jwala cultivar (Fig 3.a). At

292 biotrophic phase of infection, during colonization of subcuticular hyphae beneath the cuticle in  
293 resistant when compared to that of susceptible genotype after 48 hours of inoculation (Fig 3.b).  
294 Genes from LRR(14,6,3,1,2,9,10), G-type lectin (16,17,18,19) and WAK (23,24,26) families  
295 showed significant up-regulation while LRR (CaRLK2) exhibited down-regulation. During the  
296 necrotic phase, after 72 hours of inoculation defense-related genes (Fig 3.c). Gene CaRLK 2  
297 from G-Lectin family, CaRLK 23, 25 from WAK, CaRLK 1, 9 and 14 from LRR families  
298 showed significant up-regulation. Furthermore genes CaRLK 17, 18 from G type lectin and  
299 CaRLK7 from LRR family have shown down regulation in resistant genotype when compared to  
300 susceptible genotype at a phase where extensive cell death of epidermal and mesophyll cells,  
301 instigating necrotic phase. In the present investigation number of genes belonging to LRR family  
302 was up-regulated in Pbc-80 indicating a potential defensive role. At formation of acervullus stage  
303 (216h after inoculation), genes from LRR (6,7,11,1,2,14), WAK (22,23,24,25,26) and G-Lectins  
304 (15,16,19,20) were significantly up-regulated While CaRLK 7,17 and 22 were down-regulated in  
305 pbc-80 when compared to pusajwala (Fig 3.d). Instability index of all genes up-regulated  
306 remained unstable in nature. At last stage, conidial dispersion after 216 h of inoculation. Genes  
307 from LRR family CaRLK 6, 1 and from LRRXII subfamily CaRLK8 showed a significant up-  
308 regulation. Whereas LRR (CaRLK 6) has down-regulated at severe stress conditions (Fig 3.e).

309 **Fig 3.** Expression profiles of CaRLK genes in leaf tissue in response to *Colletotrichum*  
310 *truncatum* at various time intervals (a) 24, (b) 48, (c) 72, (d) 148 (e) 216 hours after inoculation.  
311 Mean values and Standard Deviation for three replicates are shown.

## 312 **Discussion**

313 Receptor-like kinases plays a vital role in plant development, signal transduction and defense  
314 responses [30]. Availability of sequenced genomes had facilitated the researchers to study  
315 various functional roles of RLK family genes in various stress adaptation procedures in many  
316 model plants like Rice, Arabidopsis, Tobacco, Wheat, Tomato, Soybean etc., [31]. Most of the  
317 candidate RLK genes involved in primary immune responses associated with disease resistance  
318 belong to non-RDclass kinases. Present investigation was aimed at genome-wide identification  
319 of non-RD kinases in hot pepper a vegetable crop with global agricultural and economic  
320 importance, whose production has been hindered by several biotic stresses [32]. A total of 8 and  
321 35 percent of non-RD motifs were identified among IRAK family members in Arabidopsis and  
322 Rice [7]. This huge difference may be due to monocot-dicot diversification. Comparative  
323 phylogeny of hot pepper with model plants revealed the evolutionary existence of seven  
324 subfamilies from non RD class of RLK gene family. CaRLK genes were more closely related to  
325 genes from arabidopsis and tomato than rice, reflecting the fact that arabidopsis, tomato and  
326 pepper are eudicots and diverged more recently from a common ancestor [33].

327 Gene duplication events majorly include tandem, segmental and whole-genome  
328 duplications with substantial roles occurring in the evolution [34]. In hot pepper among 26 genes  
329 three pairs from chromosome 2 and 11 unveiled tandem duplications within LRR and WAK  
330 families evolved from common ancestor LRRXII family. In hot pepper, tandem duplication may  
331 signify LRRXII family lineage-specific expansion with novel gene expression. Whereas  
332 Hofberger et al. (2015) reported lineage-specific expansion of L-type lectin receptor kinase gene  
333 family by tandem duplication event in Brassicaceae. While only one pair from the stress-antifung  
334 subfamily of G-type lectin showed segmental duplication in the second chromosome. Segmental  
335 duplication majorly contributes to gene expression and plays an important role in immunity,



336 growth and defense responses to external stimuli [20]. Results were in accordance with Cannon  
337 et al. (2004) [35] who reported a negative correlation between tandem and segmental duplication  
338 within *Arabidopsis* gene families. Furthermore, the substitution rate of non-synonymous ( $K_a$ )  
339 and synonymous ( $K_s$ ) mutations was assessed to evaluate the selection pressures and divergence  
340 time succeeded among the duplicated CaRLK gene pairs (S4). LRR and WAK gene families  
341 formed by natural selection in hot pepper may hold extra functional members associated with  
342 speciation or adaptation. While single gene pair G-type lectin family showed positive selection  
343 and may be involved in functional diversification as described by Haung et al. (2016) [36].

344         Introns execute a major role in cellular and developmental processes via alternate splicing  
345 or gene expression regulation [37]. Five intron less genes were found in hot pepper, likewise,  
346 Yang et al. (2009) [38] also reported the presence of intron less genes in taxonomic species like  
347 *Arabidopsis thaliana*, *Populus deltoides* and *Oryza sativa* representing their lineage-specific  
348 expansion with specific function in the evolution. In hot pepper among 26 non-RD genes only 10  
349 genes had exhibited single intron in its structure. Xu et al. (2017) [34] also reported the presence  
350 of fifteen single intron genes in *Populus deltoides* with multiple functions. Genes present in a  
351 family usually contain the same structural organization but conversely, some genes from SD3,  
352 LRK10L2, and LRRXII subfamilies showed varied intron-exon organization in hot pepper.  
353 These variations may be due to substituted residues in conserved positions depicting the  
354 evolutionary changes occurring within a family [39].

355         *Cis*-regulatory elements are noncoding sequences that act as binding sites for  
356 transcription factors involved in proper spatiotemporal expression of genes containing them. In  
357 rice pathogen-induced, *cis*-regulatory elements like AS-1, G-box, GCC-box, and H-box were  
358 expressed and confirmed as markers for identification of resistance genes in response to fungal

359 infection (Kong et al., 2018). While few genes CaRLK 17 and 3 from SD3 and LRRXII  
360 subfamily were found to possess those genes and may also imply the same function. The  
361 presence of *Cis*-regulatory elements like F/Sbox, W box, TGACG and MYB binding site in  
362 promoter regions are involved in the stress-inducible defense gene in Maize [40].

363 In this investigation, we had analyzed differential expression patterns of particular gene  
364 during various temporal stages based on disease progression studies (Fig 4). Infection stages of  
365 *Colletotrichum truncatum* like spore adhesion, germination, and penetration by appressorium  
366 (24h), subcuticular colonization of hyphae (48h), aggregation of mycelium (72h), Acervullus  
367 formation (148h), Conidial dispersion (216h) after inoculation on leaf surface of hot pepper  
368 seedlings was observed. Gene CaRLK 1 showed the highest expression in response to  
369 *Colletotrichum truncatum* even after 216hours of infection. Our results were in accordance with  
370 Sakamoto et al. (2012) who reported the significance of LRRXII family genes in providing  
371 resistance against necrotic fungi in tomato genotype. In hot pepper three genes (CaRLK23, 24  
372 and 25) from subfamily LRK10L2, two genes (CaRLK15, 16) from SD1a subfamily and CaRLK  
373 25, 26 from WAKLRK10L1 had showed significant up-regulation in resistant variety  
374 particularly during hyphae colonization and acervuli formation. Presence of *cis*-regulatory  
375 elements like TGACG (MeJA responsive), ERE (Ethylene stress responses) STRE, MYB and  
376 MYC (defense responsive) in promoter region are majorly involved in JA-ET pathway may be  
377 responsible for providing resistance. Chowdhury et al. (2017) [41]. Reported an increase in  
378 Jasmonic Acid (JA) and Ethylene (ET) hormone-mediated signaling pathways during biotrophic  
379 and necrotrophic phase of *Colletotrichum* infection which was responsible for governing disease  
380 resistance in sesame. Three genes CaRLK 17, 18, 19 from SD3 subfamily with *cis*-regulatory  
381 element like TCA element involved in salicylic acid regulation had showed significant up-

382 regulation only during hyphae colonization. Qi et al. (2012) [42] reported the role of SA in  
383 hyphae growth and basal defense response. While Genes from SD2b family didn't exhibit any  
384 up-regulation. Few genes CaRLK 2, 7, 22 and 17 from various subfamilies had showed  
385 significant downregulation. In rice among four WAK members, three genes OsWAK14,  
386 OsWAK91 and OsWAK92 act as positive regulators and OsWAK112d as negative regulator  
387 while providing quantitative resistance against *magnaporthae oryzae* [43]. Expression studies  
388 by Rt-qPCR were used to identify candidate genes / functional markers majorly involved in crop  
389 improvement programs.

390 **Fig. 4. :** Histochemical observation of *Colletotrichum truncatum* infective structures on hot  
391 pepper leaves under electron microscope at 40 X magnification.

## 392 **Conclusion**

393 This is the first report of genome-wide identification, characterization, and expression profiling  
394 of the non-RD kinase gene family in hot pepper. We had systematically analyzed and identified  
395 26 CaRLKs, and characterized those using bioinformatics and expression analyses in response to  
396 *Colletotrichum truncatum* stress conditions. After nine days of infection one gene (CaRLK1)  
397 from LRRXII subfamily out of 26 non-RD genes was found to be expressed more in resistant  
398 genotype (PBC-80) than in susceptible genotype (Pusajwala). Moreover, identification of *cis*-  
399 elements in this gene enabled us to understand their role in conferring resistance in PBC-80  
400 genotype by activation of the phytohormone JA-ET signaling pathway. Therefore this  
401 comprehensive analysis serves as a central platform to understand various physiological and  
402 biochemical functions performed by CaRLK1 gene in providing resistance. This investigation  
403 can also pave a way to analyze stress responsive gene expression studies in various pepper

404 tissues and aids in promoting sustainable agriculture by using different crop improvement  
405 methods

## 406 **Acknowledgment**

407 Authors are thankful to departmental heads and Co-scholars of bioinformatics lab for providing  
408 facilities to carry out the work.

## 409 **Supplementary data**

410 All data associated with this paper can be found within the supplementary files.

## 411 **References**

- 412 1. Ridzuan R, Rafii MY, Ismail SI, Mohammad Yusoff M, Miah G, Usman M. Breeding for  
413 anthracnose disease resistance in chili: progress and prospects. *International journal of*  
414 *molecular sciences*. 2018 Oct;19(10):3122.
- 415 2. Saxena A, Raghuwanshi R, Singh HB. Molecular, phenotypic and pathogenic variability  
416 in *C olletotrichum* isolates of subtropical region in north-eastern India, causing fruit rot of  
417 chillies. *Journal of applied microbiology*. 2014 Nov;117(5):1422-34.
- 418 3. Roy CB, Liu H, Rajamani A, Saha T. Transcriptome profiling reveals genetic basis of  
419 disease resistance against *Corynespora cassiicola* in rubber tree (*Hevea brasiliensis*).  
420 *Current Plant Biology*. 2019 Jan 1;17:2-16.
- 421 4. Saijo Y, Loo EP, Yasuda S. Pattern recognition receptors and signaling in plant–microbe  
422 interactions. *The Plant Journal*. 2018 Feb;93(4):592-613.
- 423 5. Haffani YZ, Silva NF, Goring DR. Receptor kinase signalling in plants. *Canadian journal*  
424 *of botany*. 2004 Jan 1;82(1):1-5.

- 425 6. Dardick C, Ronald P. Plant and animal pathogen recognition receptors signal through  
426 non-RD kinases. *Plos pathogens*. 2006 Jan 20;2(1):e2.
- 427 7. Dardick C, Schwessinger B, Ronald P. Non-arginine-aspartate (non-RD) kinases are  
428 associated with innate immune receptors that recognize conserved microbial signatures.  
429 *Current opinion in plant biology*. 2012 Aug 1;15 (4):358-66.
- 430 8. Zipfel C, Kunze G, Chinchilla D, Caniard A, Jones JD, Boller T, Felix G. Perception of  
431 the bacterial PAMP EF-Tu by the receptor EFR restricts *Agrobacterium*-mediated  
432 transformation. *Cell*. 2006 May 19; 125(4):749-60.
- 433 9. Singh P, Kuo YC, Mishra S, Tsai CH, Chien CC, Chen CW, Desclos-Theveniau M, Chu  
434 PW, Schulze B, Chinchilla D, Boller T. The lectin receptor kinase-VI. 2 is required for  
435 priming and positively regulates *Arabidopsis* pattern-triggered immunity. *The Plant Cell*.  
436 2012 Mar 1;24 (3):1256-70.
- 437 10. Bai Y, Sunarti S, Kissoudis C, Visser RG, Van Der Linden G. The role of tomato WRKY  
438 genes in plant responses to combined abiotic and biotic stresses. *Frontiers in plant*  
439 *science*. 2018;9:801.
- 440 11. Petersen TN, Brunak S, Von Heijne G, Nielsen H. Signalp 4.0: discriminating signal  
441 peptides from transmembrane regions. *Nature methods*. 2011 Oct;8(10):785.
- 442 12. Letunic I, Doerks T, Bork P. SMART 7: recent updates to the protein domain annotation  
443 resource. *Nucleic acids research*. 2011 Nov 2;40(D1):D302-5.

- 444 13. Bateman A, Birney E, Cerruti L, Durbin R, Etwiller L, Eddy SR, Griffiths-Jones S, Howe  
445 KL, Marshall M, Sonnhammer EL. The Pfam protein families database. *Nucleic acids*  
446 *research*. 2002 Jan 1;30(1):276-80.
- 447 14. Bailey TL, Johnson J, Grant CE, Noble WS. The MEME suite. *Nucleic acids research*.  
448 2015 May 7;43(W1):W39-49.
- 449 15. Sakamoto T, Deguchi M, Brustolini OJ, Santos AA, Silva FF, Fontes EP. The tomato  
450 RLK superfamily: phylogeny and functional predictions about the role of the LRRII-RLK  
451 subfamily in antiviral defense. *BMC plant biology*. 2012 Dec;12(1):229.
- 452 16. Shiu SH, Bleecker AB. Plant receptor-like kinase gene family: diversity, function, and  
453 signaling. *Sci. STKE*. 2001 Dec 18;2001(113):re22-.
- 454 17. Tamura K, Stecher G, Peterson D, Filipski A, Kumar S. MEGA6: molecular evolutionary  
455 genetics analysis version 6.0. *Molecular biology and evolution*. 2013 Oct  
456 16;30(12):2725-9.
- 457 18. Kishimoto K, Kouzai Y, Kaku H, Shibuya N, Minami E, Nishizawa Y. Perception of the  
458 chitin oligosaccharides contributes to disease resistance to blast fungus *Magnaporthe*  
459 *oryzae* in rice. *The Plant Journal*. 2010 Oct;64(2):343-54.
- 460 19. Feng X, Jiang J, Padhi A, Ning C, Fu J, Wang A, Mrode R, Liu JF. Characterization of  
461 genome-wide segmental duplications reveals a common genomic feature of association  
462 with immunity among domestic animals. *BMC genomics*. 2017 Dec;18(1):293.

- 463 20. Koch MA, Haubold B, Mitchell-Olds T. Comparative evolutionary analysis of chalcone  
464 synthase and alcohol dehydrogenase loci in Arabidopsis, Arabis, and related genera  
465 (Brassicaceae). *Molecular biology and evolution*. 2000 Oct 1;17(10):1483-98.
- 466 21. Diao W, Snyder J, Wang S, Liu J, Pan B, Guo G, Ge W, Dawood M. Genome-wide  
467 analyses of the NAC transcription factor gene family in pepper (*Capsicum annuum* L.):  
468 chromosome location, phylogeny, structure, expression patterns, cis-elements in the  
469 promoter, and interaction network. *International journal of molecular sciences*. 2018  
470 Apr;19(4):1028.
- 471 22. Bárzana G, Aroca R, Bienert GP, Chaumont F, Ruiz-Lozano JM. New insights into the  
472 regulation of aquaporins by the arbuscular mycorrhizal symbiosis in maize plants under  
473 drought stress and possible implications for plant performance. *Molecular Plant-Microbe  
474 Interactions*. 2014 Apr;27(4):349-63.
- 475 23. Mishra R, Nanda S, Rout E, Chand SK, Mohanty JN, Joshi RK. Differential expression  
476 of defense-related genes in chilli pepper infected with anthracnose pathogen  
477 *Colletotrichum truncatum*. *Physiological and molecular plant pathology*. 2017 Jan 1;97:1-  
478 0.
- 479 24. Chomczynski P, Sacchi N. The single-step method of RNA isolation by acid guanidinium  
480 thiocyanate–phenol–chloroform extraction: twenty-something years on. *Nature protocols*.  
481 2006 Aug;1(2):581.
- 482 25. Livak KJ, Schmittgen TD. Analysis of relative gene expression data using real-time  
483 quantitative PCR and the 2–  $\Delta\Delta$ CT method. *Methods*. 2001 Dec 1;25(4):402-8.

- 484 26. Hachez C, Moshelion M, Zelazny E, Cavez D, Chaumont F. Localization and  
485 quantification of plasma membrane aquaporin expression in maize primary root: a clue to  
486 understanding their role as cellular plumbers. *Plant molecular biology*. 2006 Sep 1; 62 (1-  
487 2):305-23.
- 488 27. He S. Genome-wide identification and transcriptional expression analysis of mitogen-  
489 activated protein kinase and mitogen-activated protein kinase kinase genes in *Capsicum*  
490 *annuum*. *Frontiers in plant science*. 2015 Sep 25;6: 780.
- 491 28. Qin L, Mo N, Muhammad T, Liang Y. Genome-wide analysis of DCL, AGO, and RDR  
492 gene families in pepper (*Capsicum annuum* L.). *International journal of molecular*  
493 *sciences*. 2018 Apr;19(4):1038.
- 494 29. Afzal AJ, Wood AJ, Lightfoot DA. Plant receptor-like serine threonine kinases: roles in  
495 signaling and plant defense. *Molecular Plant-Microbe Interactions*. 2008 May;21(5):507-  
496 17.
- 497 30. Passricha N, Saifi SK, Singh R, Kharb P, Tuteja N. Receptor-Like Kinases Control the  
498 Development, Stress Response, and Senescence in Plants. *Insenscence Signalling and*  
499 *Control in Plants* 2019 Jan 1 (pp. 199-210). Academic Press.
- 500 31. Saxena A, Raghuwanshi R, Gupta VK, Singh HB. Chilli anthracnose: The epidemiology  
501 and management. *Frontiers in microbiology*. 2016 Sep 30;7:1527.
- 502 32. Li J, Hou H, Li X, Xiang J, Yin X, Gao H, Zheng Y, Bassett CL, Wang X. Genome-wide  
503 identification and analysis of the SBP-box family genes in apple (*Malus× domestica*  
504 Borkh.). *Plant Physiology and Biochemistry*. 2013 Sep 1;70:100-14.



- 505 33. Xu Z, Gao L, Tang M, Qu C, Huang J, Wang Q, Yang C, Liu G, Yang C. Genome-wide  
506 identification and expression profile analysis of CCH gene family in *Populus*. *Peerj*. 2017  
507 Oct 27;5:e3962.
- 508 34. Hofberger JA, Nsibo DL, Govers F, Bouwmeester K, Schranz ME. A complex interplay  
509 of tandem-and whole-genome duplication drives expansion of the L-type lectin receptor  
510 kinase gene family in the brassicaceae. *Genome biology and evolution*. 2015 Jan  
511 28;7(3):720-34.
- 512 35. Cannon SB, Mitra A, Baumgarten A, Young ND, May G. The roles of segmental and  
513 tandem gene duplication in the evolution of large gene families in *Arabidopsis thaliana*.  
514 *BMC plant biology*. 2004 Dec;4 (1):10.
- 515 36. Huang BH, Chen YW, Huang CL, Gao J, Liao PC. Imbalanced positive selection  
516 maintains the functional divergence of duplicated DIHYDROKAEMPFEROL 4-  
517 REDUCTASE genes. *Scientific reports*. 2016 Dec 14; 6:39031.
- 518 37. Wang Y, Liu J, Huang BO, Xu YM, Li J, Huang LF, Lin J, Zhang J, Min QH, Yang WM,  
519 Wang XZ. Mechanism of alternative splicing and its regulation. *Biomedical reports*. 2015  
520 Mar 1;3(2):152-8.
- 521 38. Yang X, Jawdy S, Tschaplinski TJ, Tuskan GA. Genome-wide identification of lineage-  
522 specific genes in *Arabidopsis*, *Oryza* and *Populus*. *Genomics*. 2009 May 1;93 (5):473-80.
- 523 39. Liu PL, Huang Y, Shi PH, Yu M, Xie JB, Xie L. Duplication and diversification of lectin  
524 receptor-like kinases (*lecr1k*) genes in soybean. *Scientific reports*. 2018 Apr 12;8(1):5861.

- 525 40. Jin B, Sheng Z, Muhammad I, Chen J, Yang H. Cloning and functional analysis of the  
526 promoter of a stress-inducible gene (Zmap) in maize. Plos one. 2019 Feb 8;  
527 14(2):e0211941.
- 528 41. Chowdhury S, Basu A, Kundu S. Biotrophy-necrotrophy switch in pathogen evoke  
529 differential response in resistant and susceptible sesame involving multiple signaling  
530 pathways at different phases. Scientific reports. 2017 Dec 8;7 (1):17251.
- 531 42. Qi PF, Johnston A, Balcerzak M, Rocheleau H, Harris LJ, Long XY, Wei YM, Zheng  
532 YL, Ouellet T. Effect of salicylic acid on Fusarium graminearum, the major causal agent  
533 of fusarium head blight in wheat. Fungal Biology. 2012 Mar 1; 116 (3):413-26.
- 534 43. Delteil A, Gobbato E, Cayrol B, Estevan J, Michel-Romiti C, Dievart A, Kroj T, Morel  
535 JB. Several wall-associated kinases participate positively and negatively in basal defense  
536 against rice blast fungus. BMC plant biology. 2016 Dec; 16(1):17.

## 537 **Supporting information**

- 538 S1 Table. List of primers used for RLK expression analysis
- 539 S2 Table. Conserved motif based identification of Non RD kinases
- 540 S3 Table. Physiochemical properties of non-RD kinases in Hot pepper
- 541 S4 Table. Estimated Ka/Ks ratios and divergence times of the duplicated CaRLK genes
- 542 S5 Fig. Multiple sequence alignment of conserved motifs in kinase region of Hot pepper
- 543 S6 Fig. Identified conserved motifs in non-RD RLK in hot pepper.
- 544 S7 Fig. Distribution of non-RD kinases on hot pepper chromosomes. Chromosome numbers  
545 are indicated at top of each bar. Scale is represented in mega bases (Mb).

546 S8 Fig. Exon-intron structure of non-RD kinases.

547 Yellow indicates exon, black line indicates intron.

548 S9 Fig. *Cis*-acting elements in the promoter regions of CaRLK genes.

549 S10 Fig. Sequence length cutoffs to build the credible set

## Figures

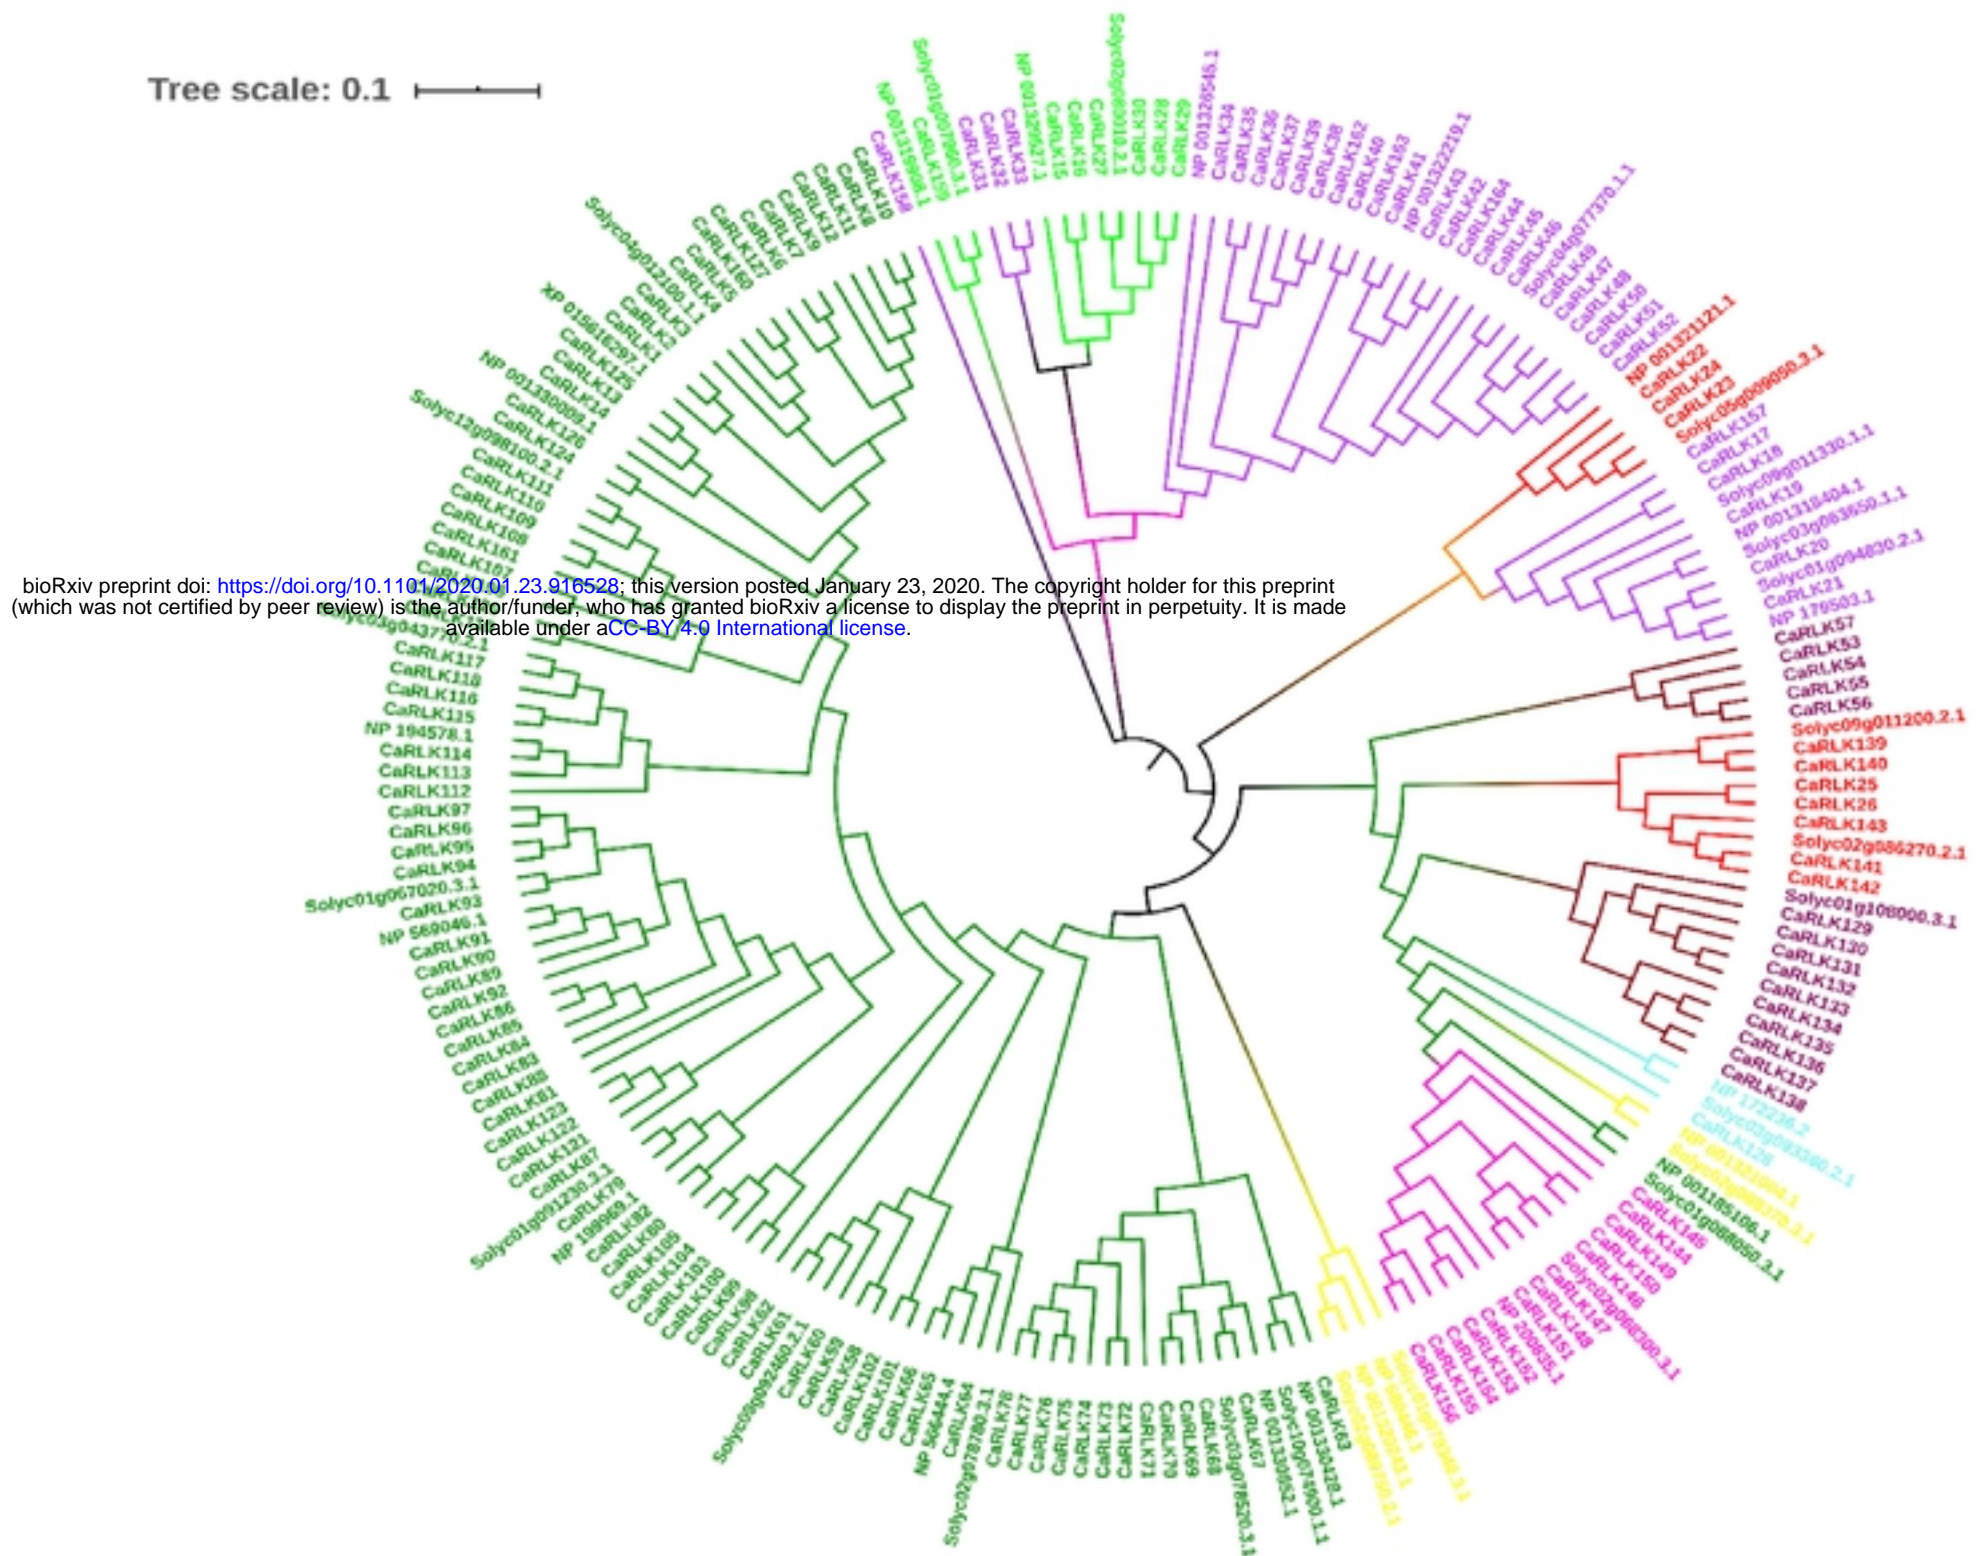

**Fig. 1.** Phylogenetic analysis of Receptor like kinase gene family from hot pepper. The phylogenetic tree was constructed using neighbor-joining (NJ) method by MEGA6.0. Subfamilies was specified in different colors.

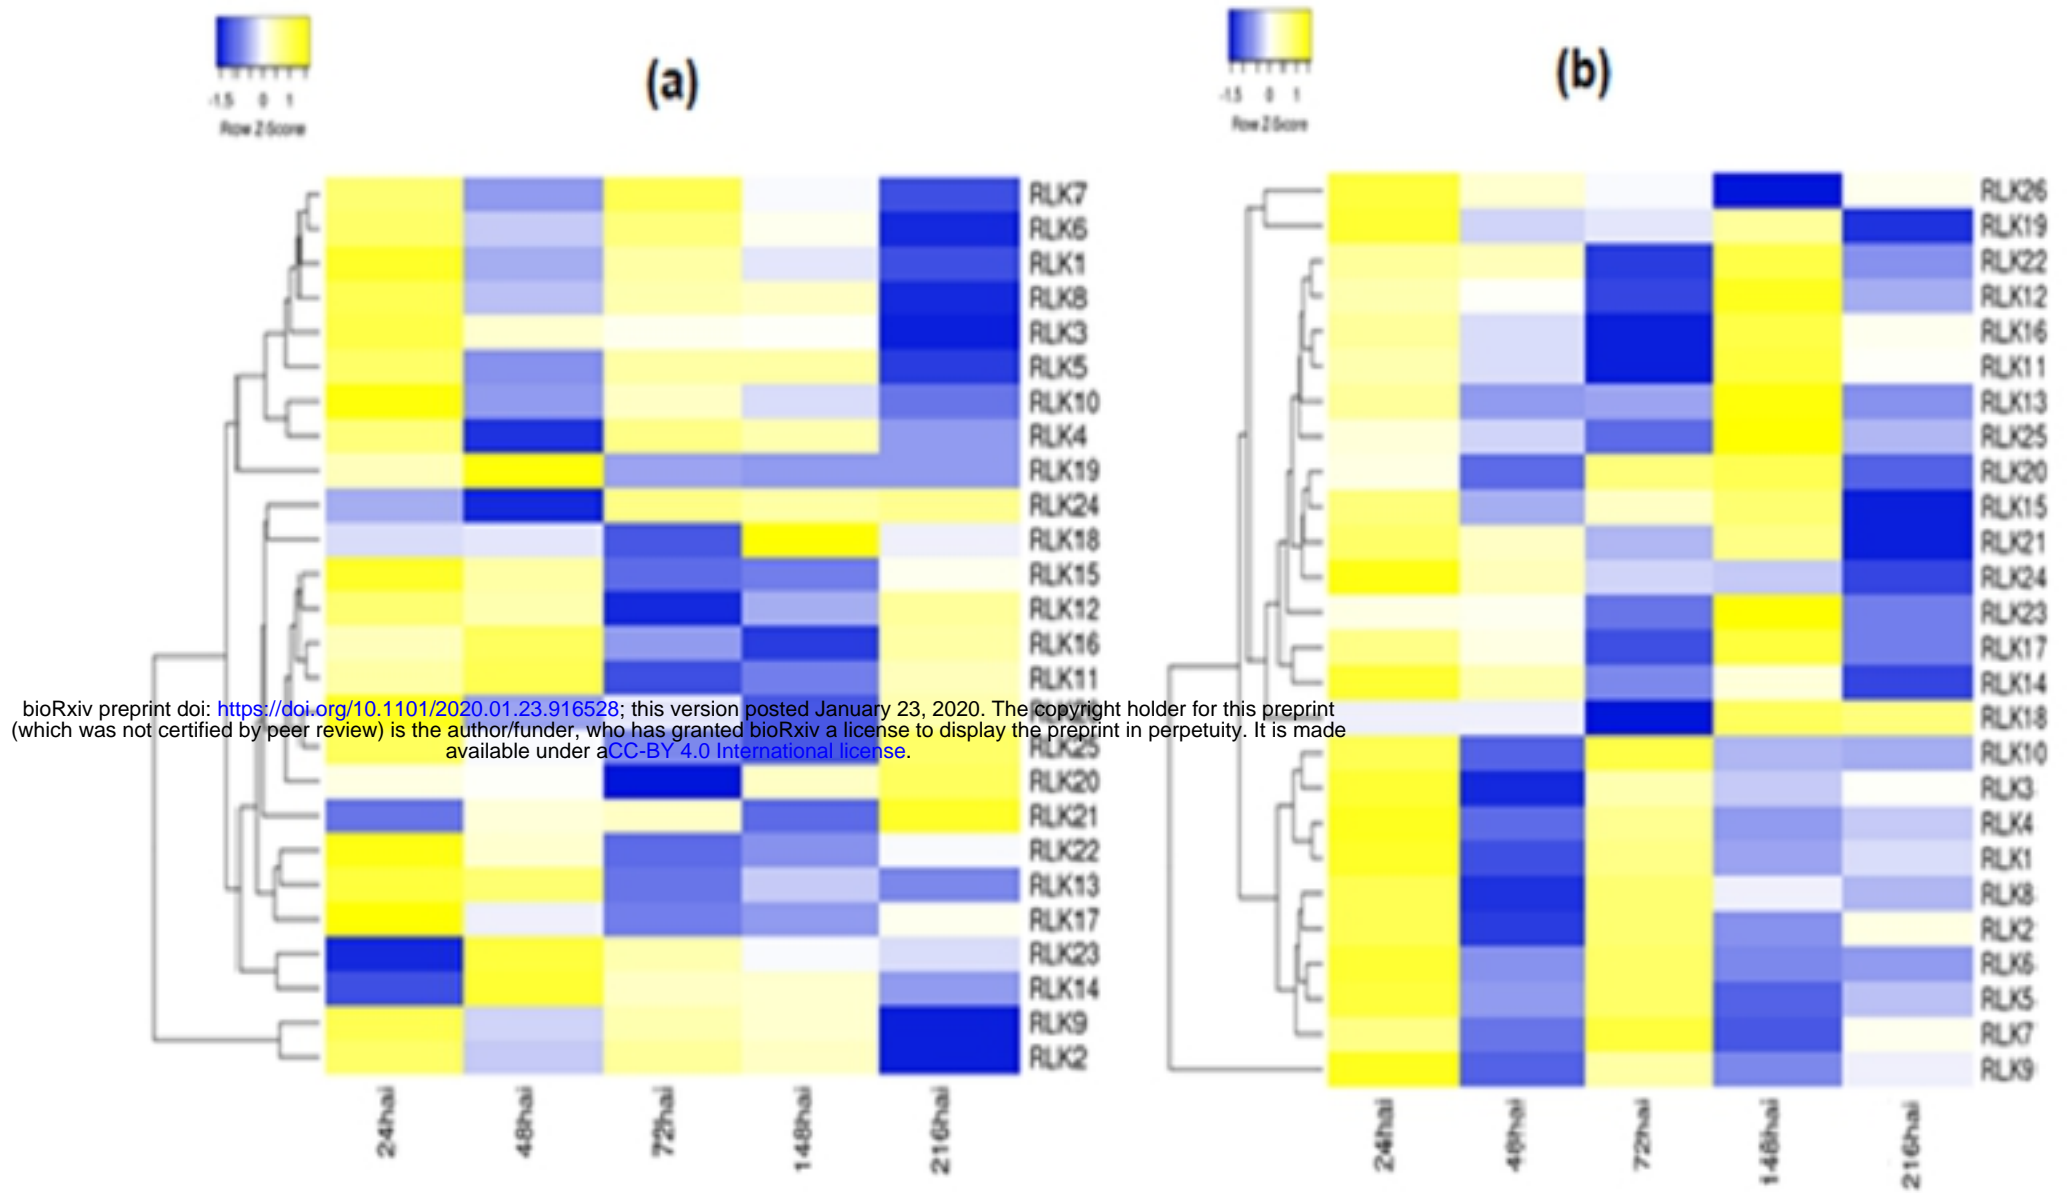

**Fig. 2.** Differential expression analyses of CaRLK genes under biotic stress. Treatment in PBC-80 (a) and pusa jwala (b) Hot pepper seedlings. The color scale represents log<sub>2</sub> expression values.

bioRxiv preprint doi: <https://doi.org/10.1101/2020.01.23.916528>; this version posted January 26, 2020. The copyright holder for this preprint (which was not certified by peer review) is the author/funder, who has granted bioRxiv a license to display the preprint in perpetuity. It is made available under aCC-BY 4.0 International license.

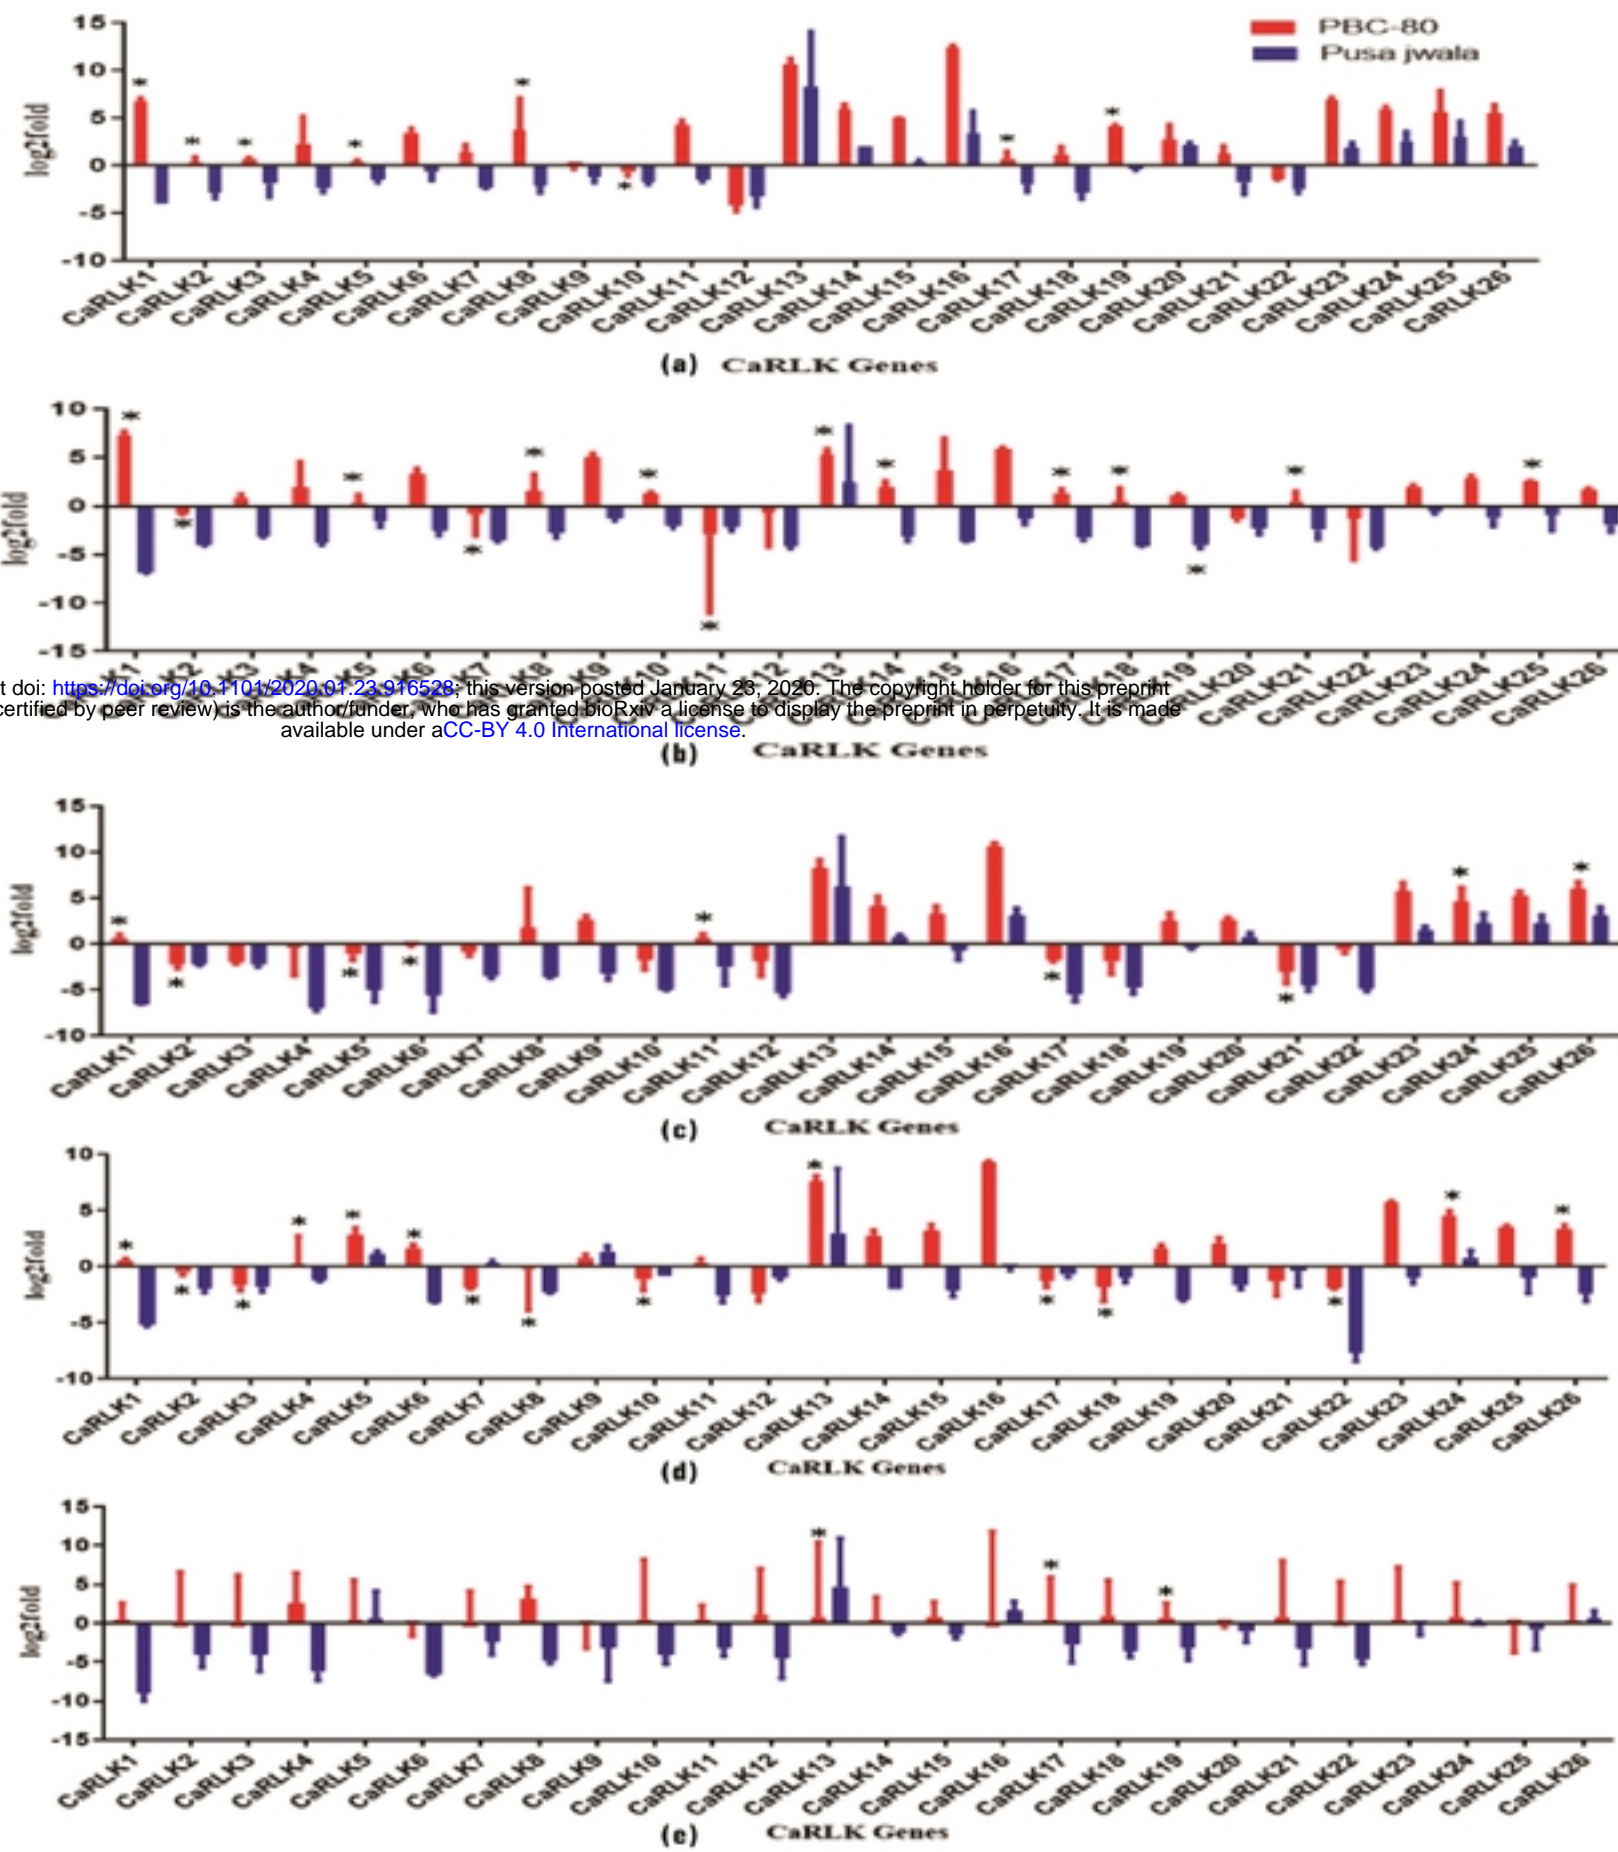

**Fig 3.** Expression profiles of CaRLK genes in leaf tissue in response to *Colletotrichum truncatum* at various time intervals (a) 24, (b) 48, (c) 72, (d) 148 (e) 216 hours after inoculation. Mean values and Standard Deviation for three replicates are shown.

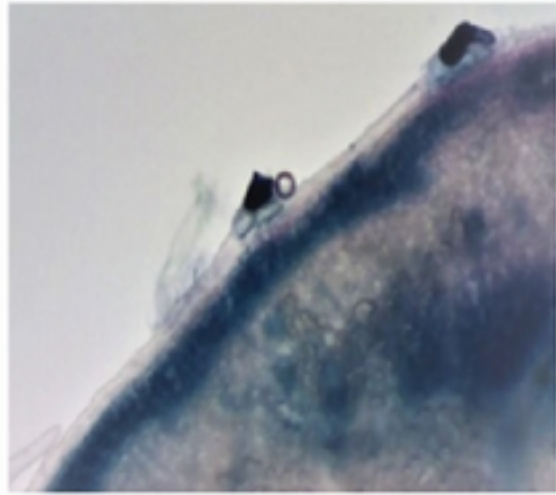

**Appressorium penetration (24-hpi)**

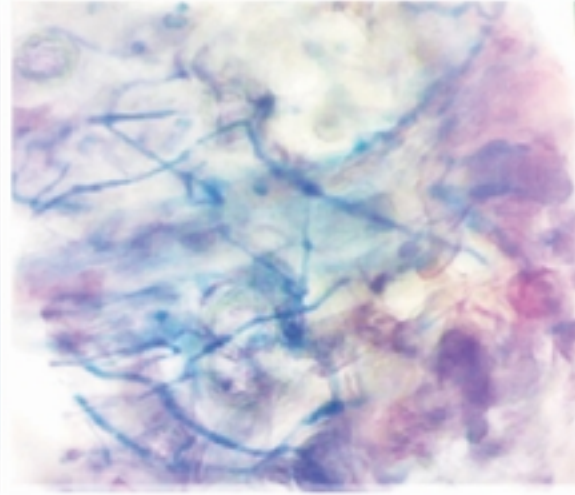

**Hyphal colonisation (48-hpi)**

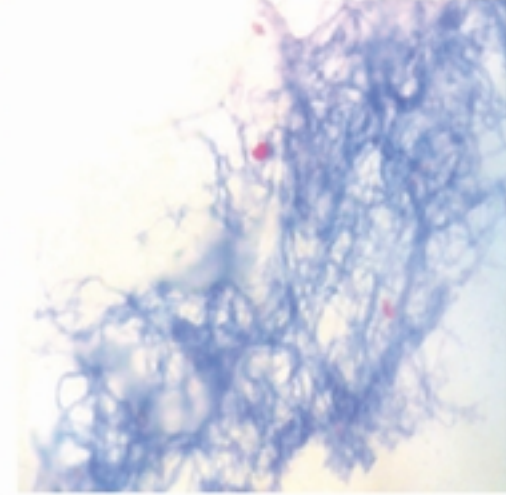

**Mycelial aggregation (72-hpi)**

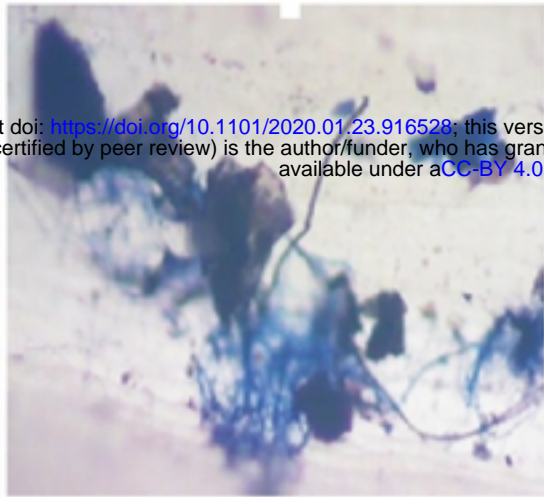

**Acervilli formation**

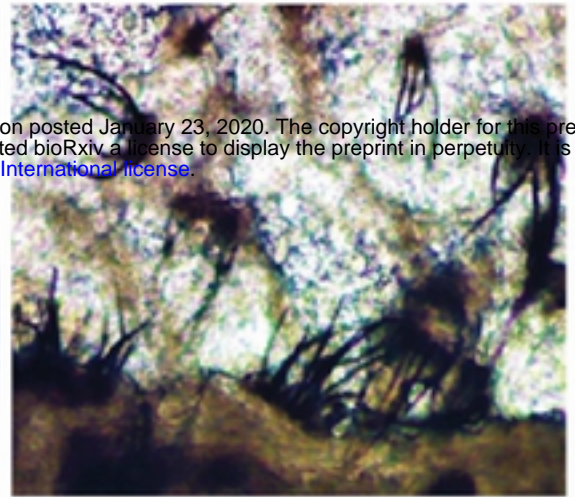

**Acervilli-setae formation (148-hpi)**

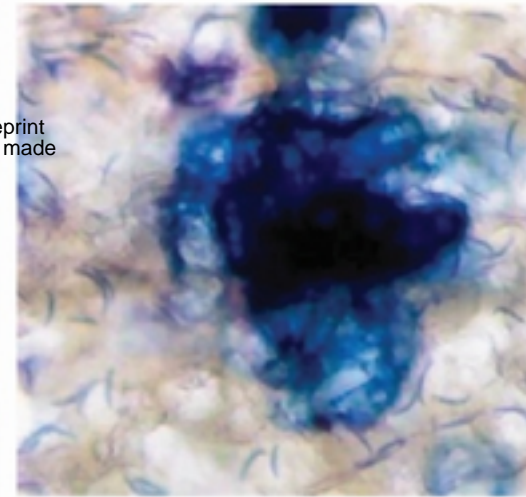

**Conidial dispersion (216-hpi)**

bioRxiv preprint doi: <https://doi.org/10.1101/2020.01.23.916528>; this version posted January 23, 2020. The copyright holder for this preprint (which was not certified by peer review) is the author/funder, who has granted bioRxiv a license to display the preprint in perpetuity. It is made available under aCC-BY 4.0 International license.

**Fig. 4. :** Histochemical observation of *Colletotrichum truncatum* infective structures on hot pepper leaves under electron microscope at 40 X magnification.
